# Supplementary material for: Study on divalent copper, nickel and zinc model complexes for fluoride ion detection
Source: Royal Society of Chemistry journal article supplement (doi:10.1039/c5ra18559a), 2015-01-01
Supplement: c5ra18559a1.pdf [file c5ra18559a1.pdf]

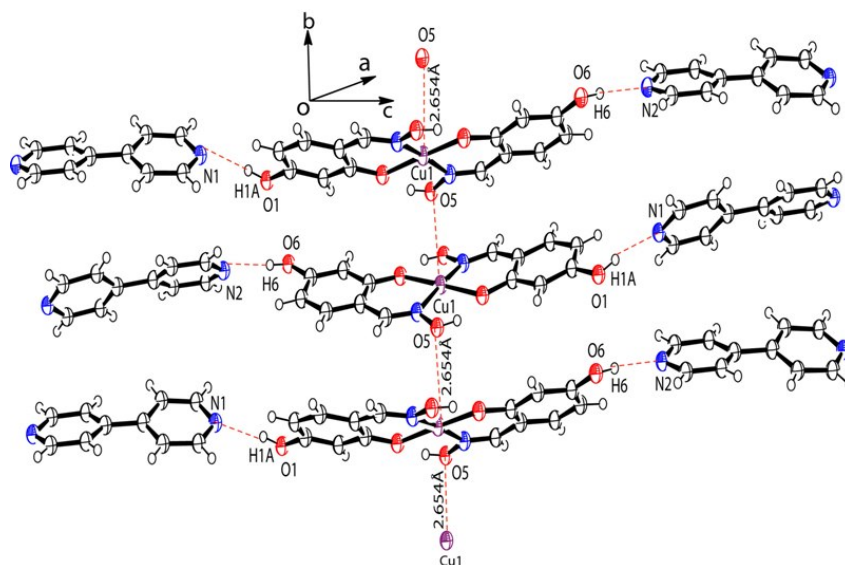

Figure S3: Structure of the complex 4

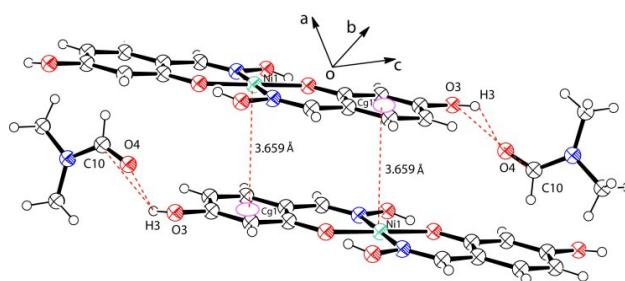

Figure S4: Structure of the complex 5

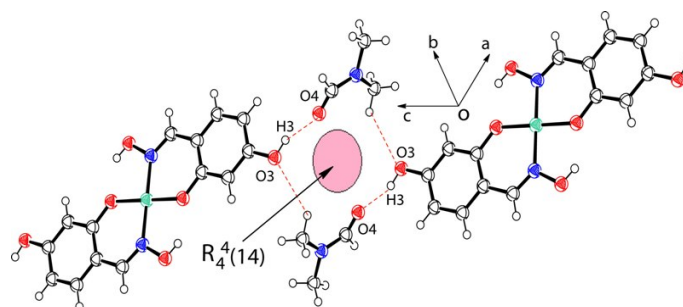

Figure S5: Solvent holding assemblies of the complex 5

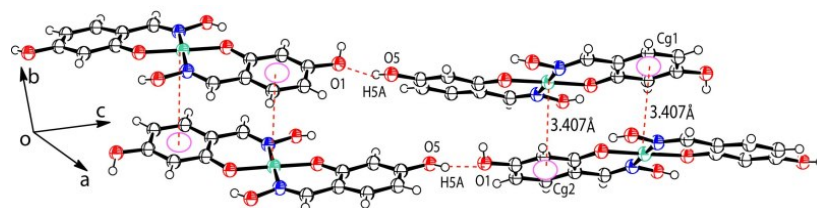

Figure S6: Structure of the complex 6

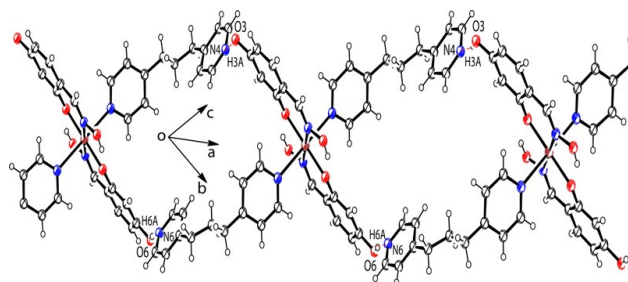

Figure S7: Self-assembly of the complex 7

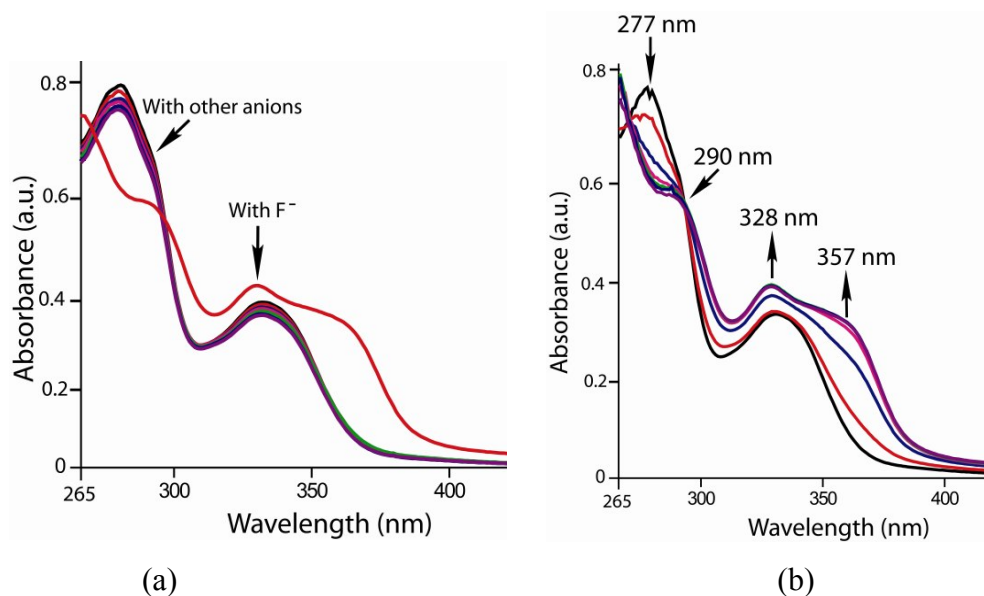

Figure S8: UV-Vis spectra of the complex **1** ( $10^{-5}$  M solution in DMSO) on addition of different amounts of the (a) Tetrabutylammonium salts (fluoride, chloride, bromide, phosphate, carbonate) solution ( $50\mu\text{l}$  of  $10^{-3}\text{M}$ ) and (b) Tetrabutylammonium fluoride ( $10\mu\text{l}$  aliquot of  $10^{-3}$  M in DMSO).

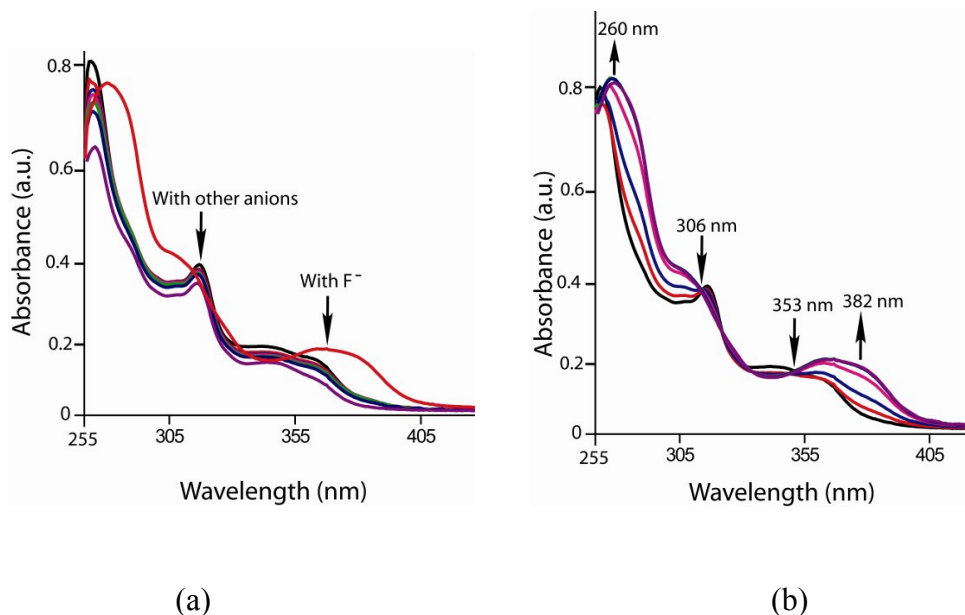

Figure S9: UV-Vis spectra of the complex **5** ( $10^{-5}$  M solution in DMSO) on addition of different amounts of the (a) Tetrabutylammonium salts (fluoride, chloride, bromide, phosphate, carbonate) solution ( $50\mu\text{l}$  of  $10^{-3}\text{M}$ ) and (b) Tetrabutylammonium fluoride ( $10\mu\text{l}$  aliquot of  $10^{-3}$  M in DMSO).

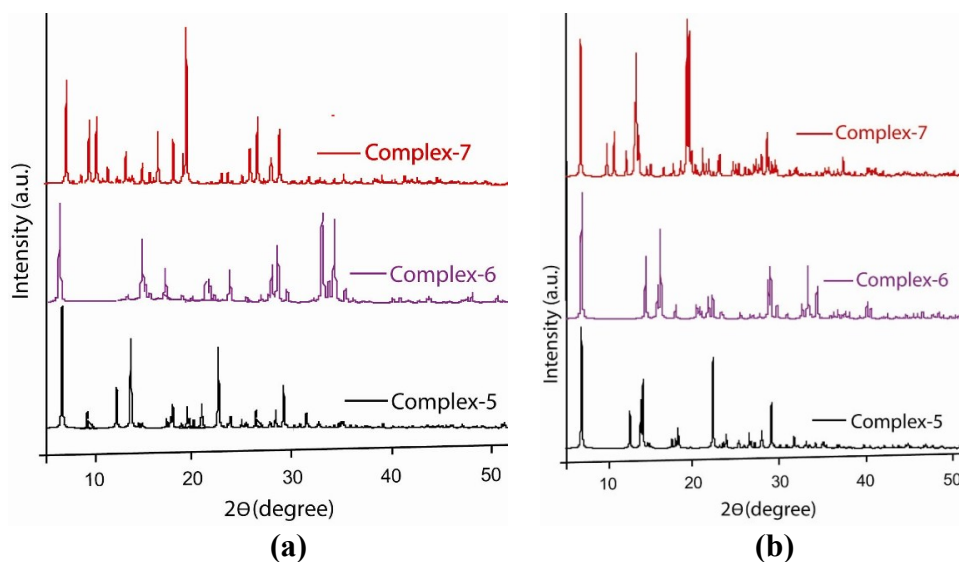

Figure S10: (a) Experimental and (b) Simulated PXRD patterns of the complexes **5-7**:

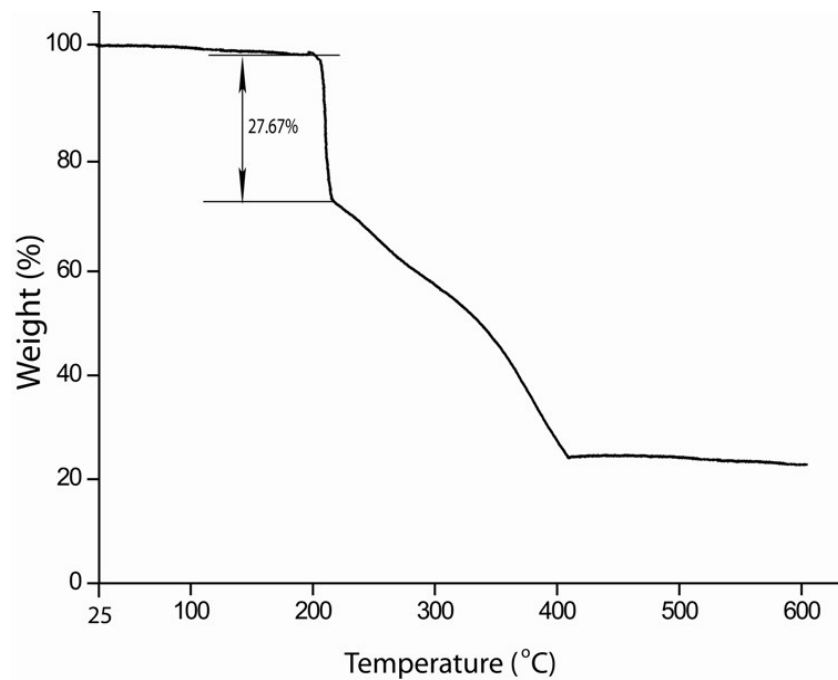

Figure S11: Thermogravimetry of the complex 1

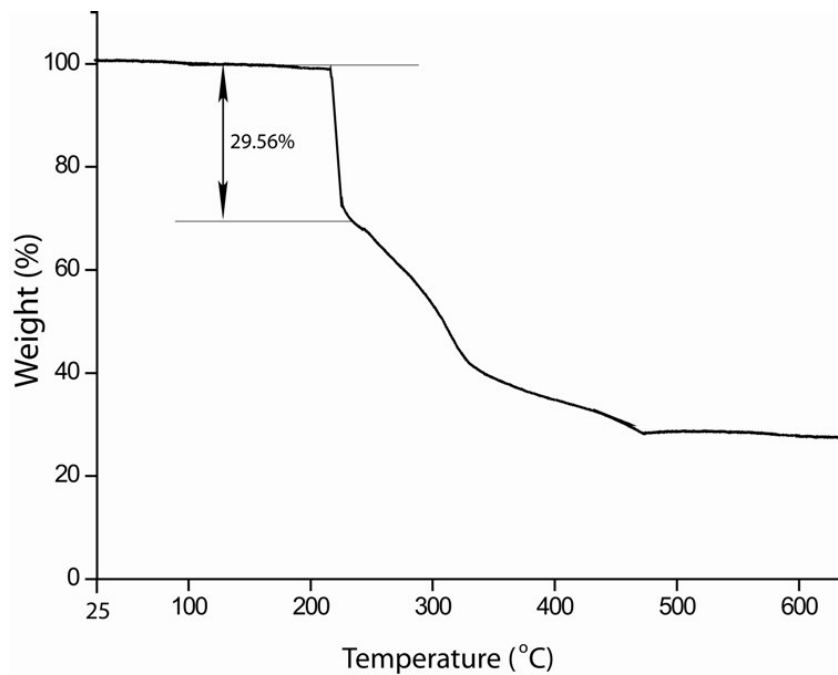

Figure S12: Thermogravimetry of the complex 2

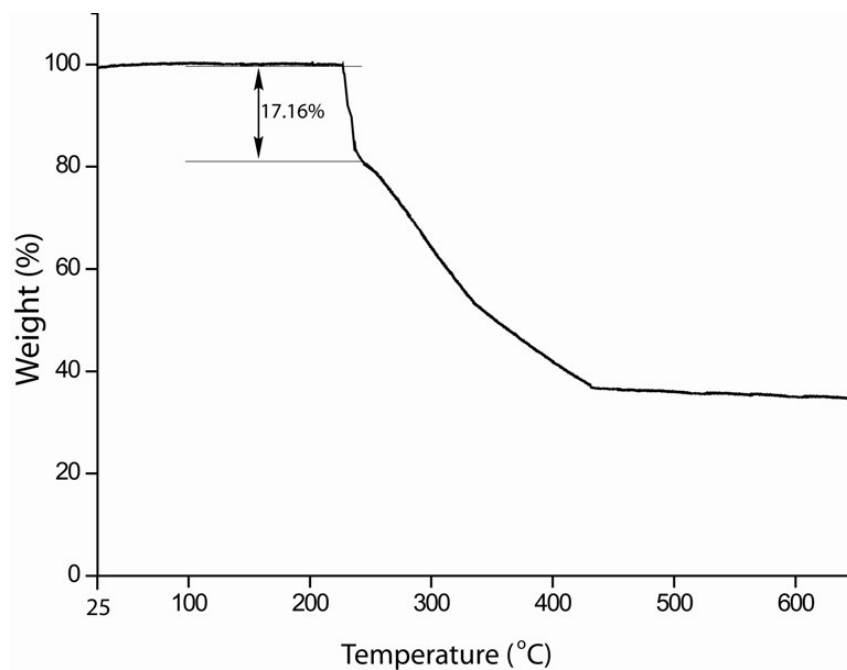

Figure S13: Thermogravimetry of the complex **3**

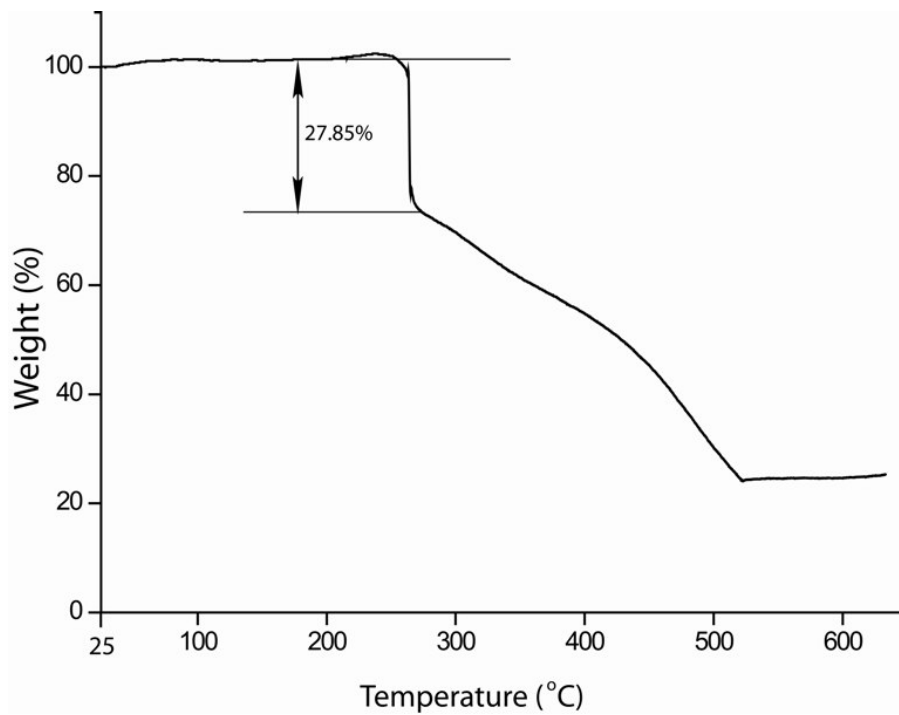

Figure S14: Thermogravimetry of the complex **5**

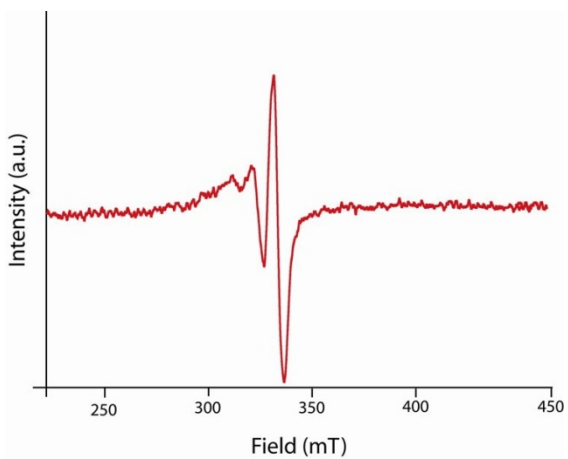

**A**

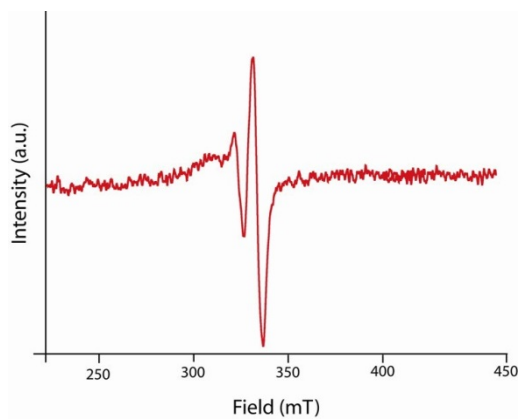

**B**

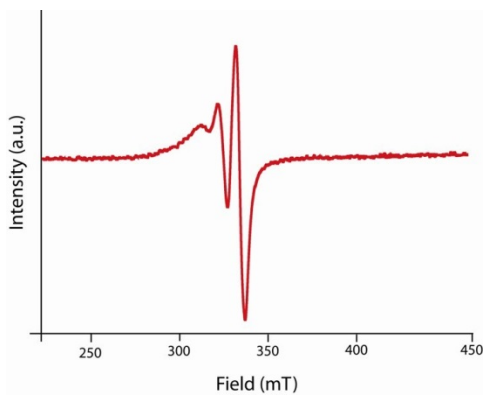

**C**

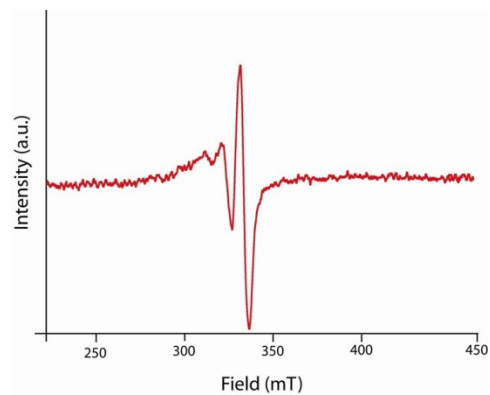

**D**

Figure S15: X-band ESR spectra of complex **1-4**: (A) **1**, (B) **2**, (C) **3**, and (D) **4**. Calculated  $g_{av}$  values are 2.031, 2.033, 2.032, and 2.031 respectively in DMSO solvent.

Table S1: Crystallographic parameters of the complexes **1-7**

|                                      | Complex <b>1</b>                                                | Complex <b>2</b>                                                | Complex <b>3</b>                                                  | Complex <b>4</b>                                                |
|--------------------------------------|-----------------------------------------------------------------|-----------------------------------------------------------------|-------------------------------------------------------------------|-----------------------------------------------------------------|
| Formula                              | C <sub>20</sub> H <sub>26</sub> CuN <sub>4</sub> O <sub>8</sub> | C <sub>22</sub> H <sub>30</sub> CuN <sub>4</sub> O <sub>8</sub> | C <sub>16</sub> H <sub>18</sub> CuN <sub>2</sub> O <sub>7</sub> S | C <sub>24</sub> H <sub>20</sub> CuN <sub>4</sub> O <sub>6</sub> |
| CCDC no.                             | 1402351                                                         | 1402356                                                         | 1402352                                                           | 1402350                                                         |
| Mol. wt.                             | 514.00                                                          | 542.05                                                          | 445.93                                                            | 523.99                                                          |
| Space group                          | P -1                                                            | P 21/n                                                          | P -1                                                              | P 21                                                            |
| a/Å                                  | 6.1974(7)                                                       | 9.3108(3)                                                       | 8.3981(7)                                                         | 10.6759(6)                                                      |
| b/Å                                  | 7.3044(9)                                                       | 7.1558(2)                                                       | 9.6705(9)                                                         | 7.0765(4)                                                       |
| c/Å                                  | 13.1416(16)                                                     | 19.0122(6)                                                      | 12.5186(9)                                                        | 14.7557(9)                                                      |
| $\alpha$ /°                          | 91.394(5)                                                       | 90.00                                                           | 73.944(7)                                                         | 90.00                                                           |
| $\beta$ /°                           | 102.247(5)                                                      | 94.749(2)                                                       | 86.252(6)                                                         | 96.369(4)                                                       |
| $\gamma$ /°                          | 101.071(5)                                                      | 90.00                                                           | 67.507(9)                                                         | 90.00                                                           |
| V/Å <sup>3</sup>                     | 569.23(12)                                                      | 1262.36(7)                                                      | 901.77(13)                                                        | 1107.88(11)                                                     |
| Density/g cm <sup>-3</sup>           | 1.499                                                           | 1.426                                                           | 1.642                                                             | 1.571                                                           |
| Abs. coeff./mm <sup>-1</sup>         | 1.013                                                           | 0.917                                                           | 1.369                                                             | 1.037                                                           |
| F(000)                               | 267                                                             | 566                                                             | 458                                                               | 538                                                             |
| Total no. of reflections             | 2040                                                            | 2261                                                            | 3252                                                              | 3830                                                            |
| Reflections, I > 2 $\sigma$ (I)      | 1279                                                            | 1830                                                            | 2383                                                              | 3231                                                            |
| Max. $\theta$ /°                     | 25.24                                                           | 25.24                                                           | 25.25                                                             | 25.24                                                           |
| Ranges (h, k, l)                     | -7 ≤ h ≤ 7<br>-8 ≤ k ≤ 6<br>-10 ≤ l ≤ 14                        | -11 ≤ h ≤ 11<br>-8 ≤ k ≤ 8<br>-22 ≤ l ≤ 22                      | -10 ≤ h ≤ 9<br>-11 ≤ k ≤ 11<br>-15 ≤ l ≤ 13                       | -12 ≤ h ≤ 12<br>-8 ≤ k ≤ 8<br>-17 ≤ l ≤ 17                      |
| Complete to 2 $\theta$ (%)           | 98.70                                                           | 98.90                                                           | 99.80                                                             | 99.50                                                           |
| Data/restraints/parameters           | 2040/0/155                                                      | 2261/0/165                                                      | 3252/0/250                                                        | 3830/1/321                                                      |
| GooF (F <sup>2</sup> )               | 1.034                                                           | 1.086                                                           | 1.027                                                             | 1.086                                                           |
| R indices [I > 2 $\sigma$ (I)]       | 0.0387                                                          | 0.0526                                                          | 0.0430                                                            | 0.0367                                                          |
| wR <sup>2</sup> [I > 2 $\sigma$ (I)] | 0.1184                                                          | 0.1438                                                          | 0.0734                                                            | 0.0684                                                          |
| R indices (all data)                 | 0.0407                                                          | 0.0602                                                          | 0.0651                                                            | 0.0473                                                          |
| wR <sup>2</sup> (all data)           | 0.1222                                                          | 0.1537                                                          | 0.0852                                                            | 0.0713                                                          |



|                                      | Complex 5                                                       | Complex 6                                                       | Complex 7                                                        |
|--------------------------------------|-----------------------------------------------------------------|-----------------------------------------------------------------|------------------------------------------------------------------|
| Formula                              | C <sub>20</sub> H <sub>26</sub> NiN <sub>4</sub> O <sub>8</sub> | C <sub>14</sub> H <sub>12</sub> N <sub>2</sub> NiO <sub>6</sub> | C <sub>40</sub> H <sub>40</sub> N <sub>6</sub> O <sub>6</sub> Zn |
| CCDC no.                             | 1402354                                                         | 1402353                                                         | 1402355                                                          |
| Mol.wt.                              | 509.14                                                          | 362.95                                                          | 766.17                                                           |
| Space group                          | P -1                                                            | P2 <sub>1</sub> /c                                              | P -1                                                             |
| a/Å                                  | 6.2331(6)                                                       | 6.8784(8)                                                       | 7.7539(6)                                                        |
| b/Å                                  | 7.2148(6)                                                       | 7.0931(8)                                                       | 9.7058(8)                                                        |
| c/Å                                  | 13.1150(12)                                                     | 27.221(3)                                                       | 13.6203(10)                                                      |
| $\alpha$ /°                          | 90.288(5)                                                       | 90.00                                                           | 75.256(5)                                                        |
| $\beta$ /°                           | 101.143(5)                                                      | 90.610(3)                                                       | 79.970(5)                                                        |
| $\gamma$ /°                          | 100.988(5)                                                      | 90.00                                                           | 72.318(5)                                                        |
| V/Å <sup>3</sup>                     | 567.52(9)                                                       | 1328.0(3)                                                       | 939.22(13)                                                       |
| Density/g cm <sup>-3</sup>           | 1.490                                                           | 1.815                                                           | 1.355                                                            |
| Abs. coeff./mm <sup>-1</sup>         | 0.908                                                           | 1.498                                                           | 0.709                                                            |
| F(000)                               | 266                                                             | 744                                                             | 400                                                              |
| Total no. of reflections             | 2044                                                            | 2390                                                            | 3398                                                             |
| Reflections, I > 2 $\sigma$ (I)      | 1883                                                            | 1239                                                            | 2704                                                             |
| Max. $\theta$ /°                     | 25.00                                                           | 25.24                                                           | 25.25                                                            |
| Ranges (h, k, l)                     | -7 ≤ h ≤ 7<br>-8 ≤ k ≤ 8<br>-15 ≤ l ≤ 15                        | -7 ≤ h ≤ 5<br>-4 ≤ k ≤ 7<br>-31 ≤ l ≤ 22                        | -9 ≤ h ≤ 9<br>-11 ≤ k ≤ 10<br>-16 ≤ l ≤ 15                       |
| Complete to 2 $\theta$ (%)           | 99.90                                                           | 99.30                                                           | 99.40                                                            |
| Data/restraints/parameters           | 2044/3/141                                                      | 2390/0/209                                                      | 3398/0/241                                                       |
| GooF (F <sup>2</sup> )               | 1.015                                                           | 1.077                                                           | 1.008                                                            |
| R indices [I > 2 $\sigma$ (I)]       | 0.0738                                                          | 0.0658                                                          | 0.0358                                                           |
| wR <sup>2</sup> [I > 2 $\sigma$ (I)] | 0.1888                                                          | 0.1902                                                          | 0.0818                                                           |
| R indices (all data)                 | 0.0754                                                          | 0.0887                                                          | 0.0491                                                           |
| wR <sup>2</sup> (all data)           | 0.1880                                                          | 0.2031                                                          | 0.0882                                                           |

Table S2: Selected bond parameters of complexes 5-7

|           |        |            |           |           |           |           |
|-----------|--------|------------|-----------|-----------|-----------|-----------|
| Complex 5 | Ni-O1  | 1.843(8)   | O1-Ni-O1' | 179.99(2) | O1'-Ni-N1 | 89.2(3)   |
|           | Ni-N1  | 1.877(10)  | O1-Ni-N1  | 90.8(3)   | N1-Ni-N1' | 179.99(1) |
| Complex 6 | Ni1-O1 | 1.832(5)   | O2-Ni-O1  | 179.1(3)  | O2-Ni-N1  | 87.3(3)   |
|           | Ni1-O2 | 1.829(5)   | O2-Ni-N2  | 92.6(3)   | O1-Ni-N1  | 93.0(3)   |
|           | Ni1-N1 | 1.865(7)   | O1-Ni-N2  | 87.2(3)   | N2-Ni-N1  | 178.0(3)  |
|           | Ni1-N2 | 1.865(7)   |           |           |           |           |
| Complex 7 | Zn1-O2 | 2.010(13)  | O2-Zn-O2' | 180.0     | N1-Zn-N1' | 180.0     |
|           | Zn1-N1 | 2.034 (16) | O2-Zn-N1  | 90.02(6)  | O2-Zn-N2  | 88.42(6)  |
|           | Zn1-N2 | 2.381 (18) | O2-Zn-N1' | 89.98(6)  | O2-Zn-N2' | 91.57(6)  |
|           |        |            | N1-Zn-N1' | 180.0     | N1-Zn-N2  | 94.16(6)  |
|           |        |            | N1'-Zn-N3 | 85.85(6)  | N1-Zn-N2  | 85.84(6)  |

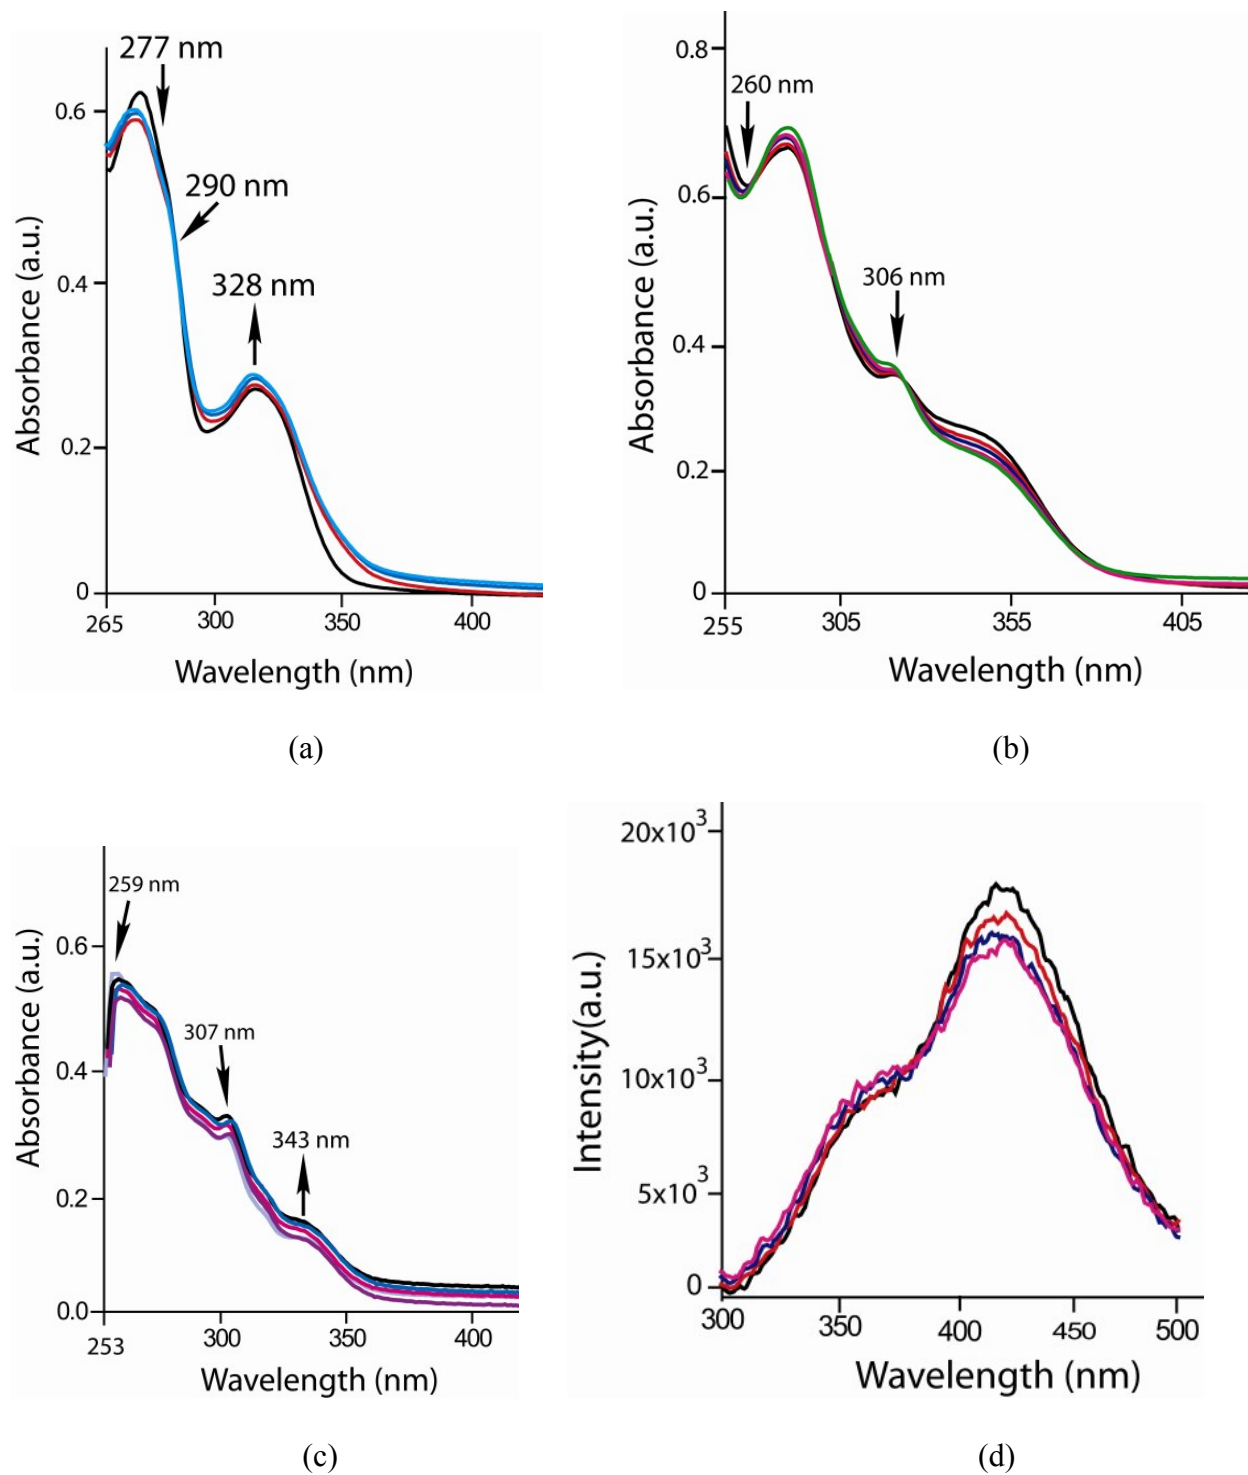

Figure S16: UV-Vis spectra (a) complex **1**, (b) complex **5** and (c) complex **7** in water on addition of different amounts of the tetrabutylammonium fluoride (100 $\mu$ l aliquot of  $10^{-5}$  M in water). (d) Fluorescence spectra of complex **7** in water on addition of different amount of the tetrabutylammonium fluoride (100 $\mu$ l aliquot of  $10^{-5}$  M in water).

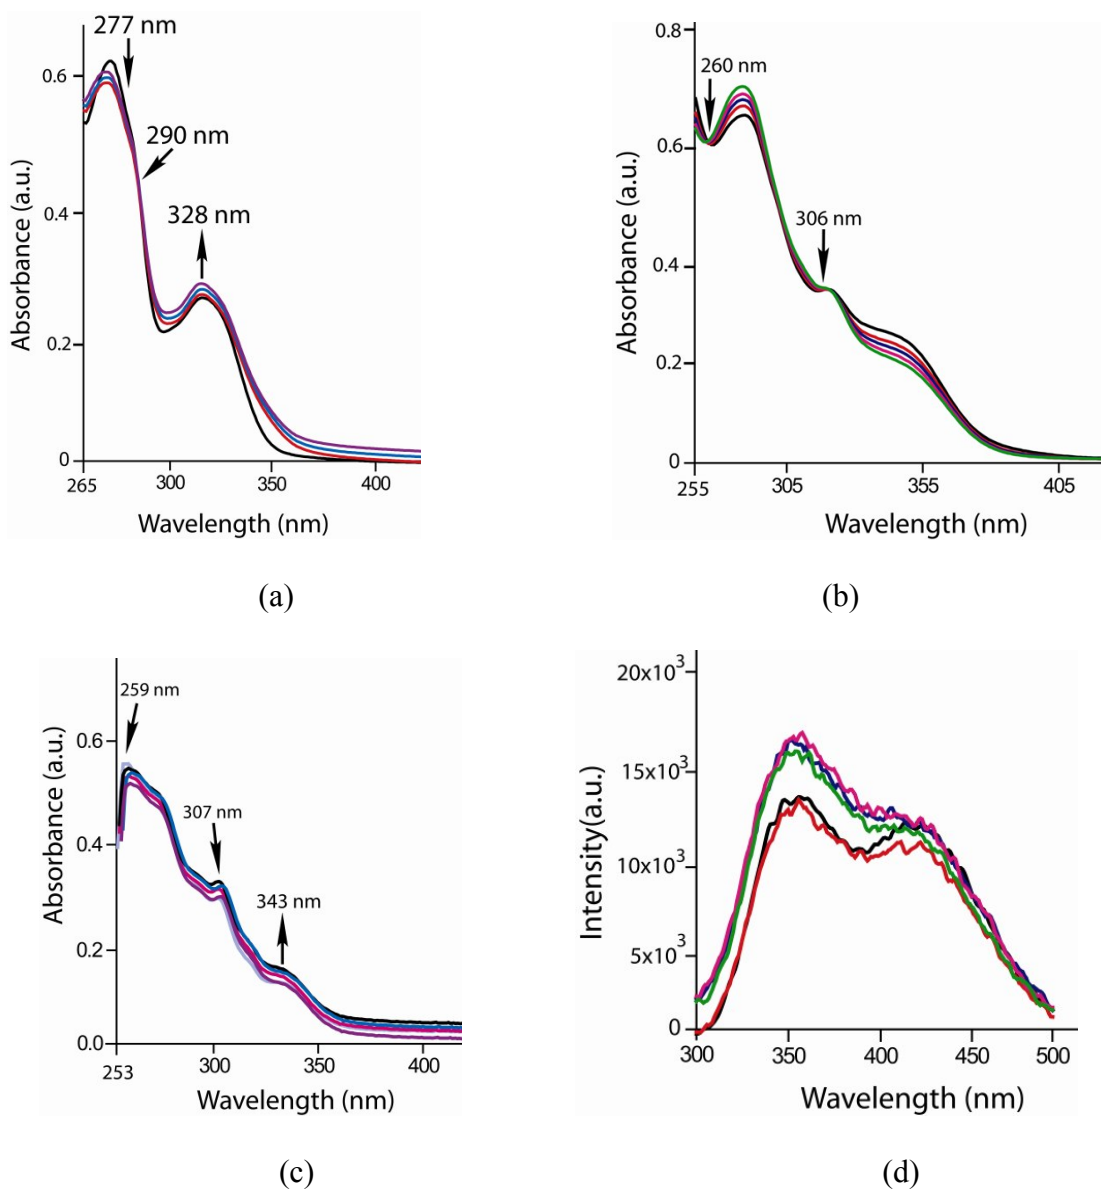

Figure S17: UV-Vis spectra (a) complex **1**, (b) complex **5** and (c) complex **7** in DMSO-Water mixture on addition of different amounts of the tetrabutylammonium fluoride (100 $\mu$ l aliquot of  $10^{-3}$  M in DMSO-Water). (d) Fluorescence spectra of complex **7** in DMSO-Water on addition of different amount of the tetrabutylammonium fluoride (100 $\mu$ l aliquot of  $10^{-3}$  M in DMSO-Water).

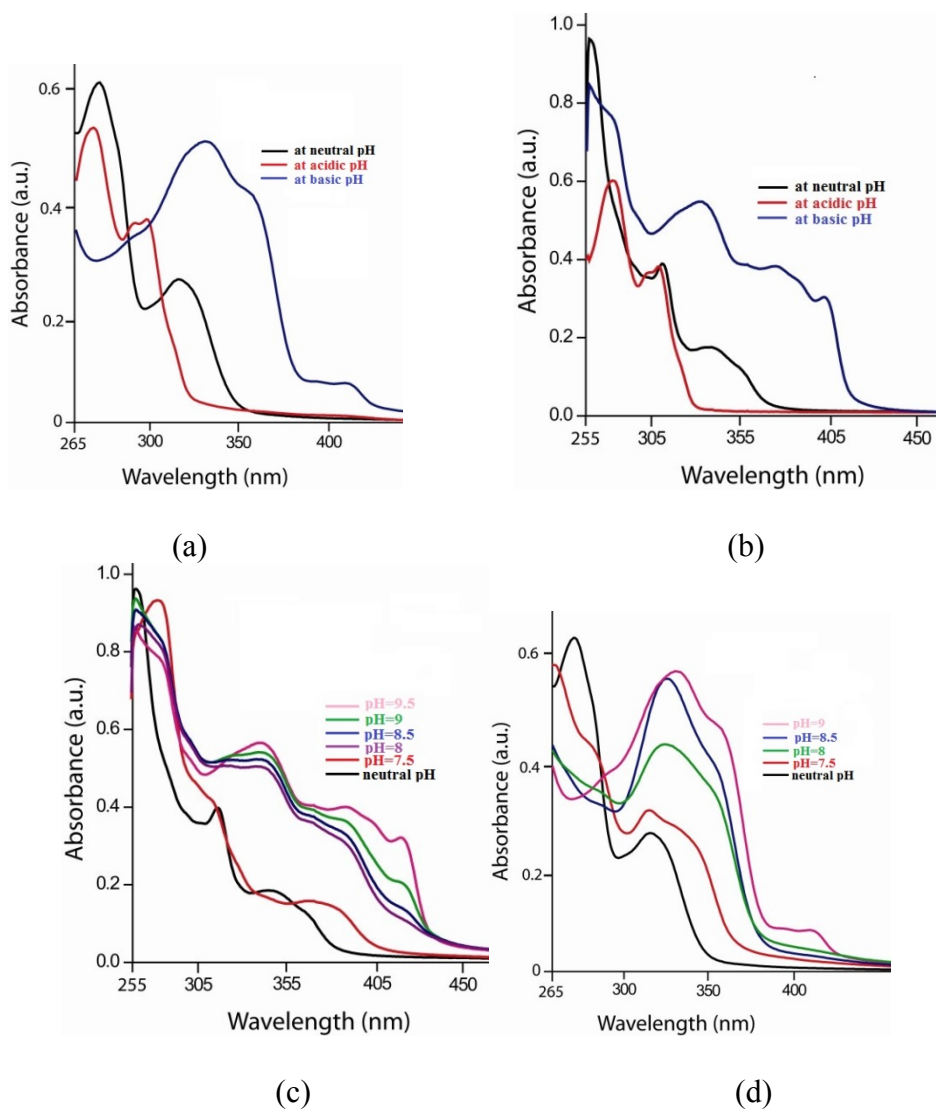

Figure S18: UV-Vis spectra of the (a) complex **1**, (b) complex **5** at different pH and (c) and (d) at pH = 8.5 spectra of complex **1** and **5**.

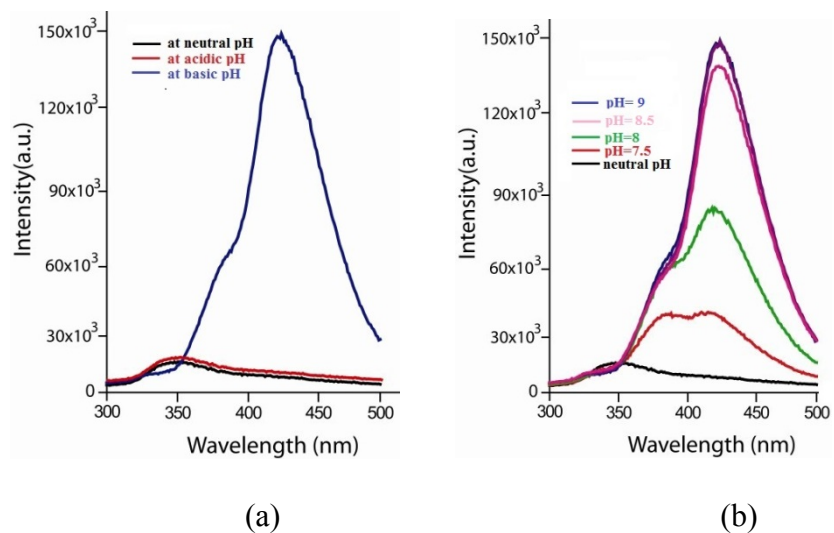

Figure S19: Fluorescence spectra of complex 7 (a) at different pH and (b) at different basic pH.

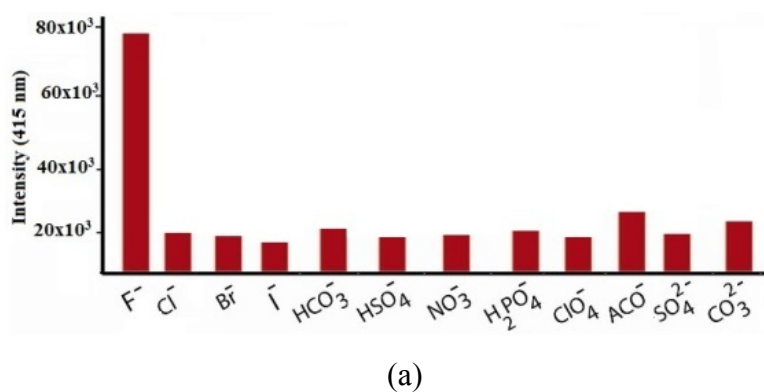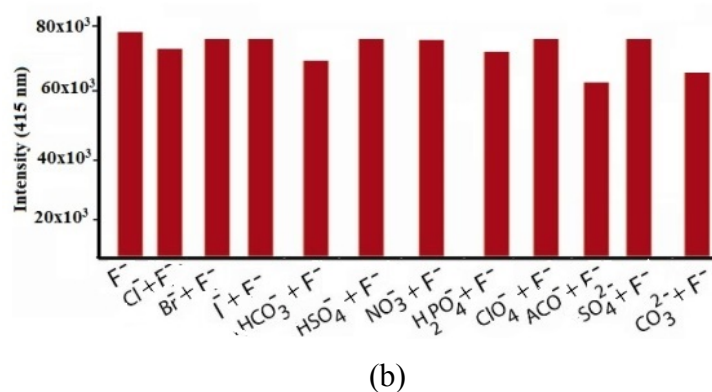

Figure S20: (a) Fluorescence intensities at 415 nm for the complex 7 ( $10^{-5}\text{M}$ ) in the presence of  $10^{-3}\text{M}$  different anions. (b) Fluorescence intensities at 415 nm for complex 7 ( $10^{-5}\text{M}$ ) in the presence of  $10^{-3}\text{M}$  of  $\text{F}^-$  and with the addition of  $10^{-3}\text{M}$  of different anions respectively.

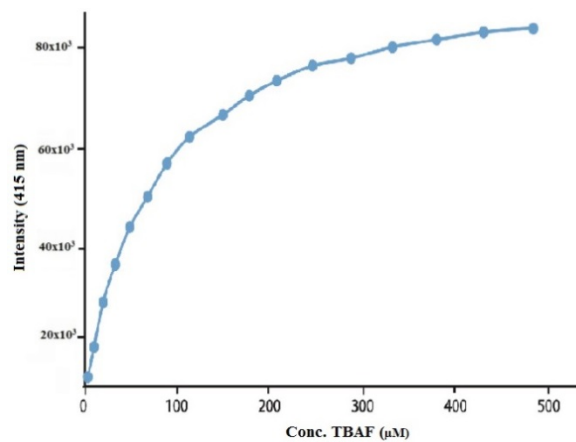

Figure S21: Fluorescence intensity versus tetrabutylammonium fluoride [TBAF] plot of zinc complex at 415nm.

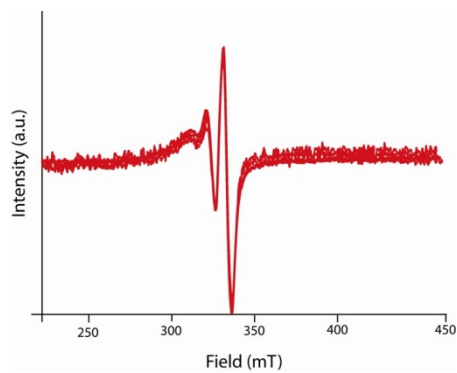

Figure S22: EPR spectrum of copper complex **1** with tetrabutyl ammonium fluoride.

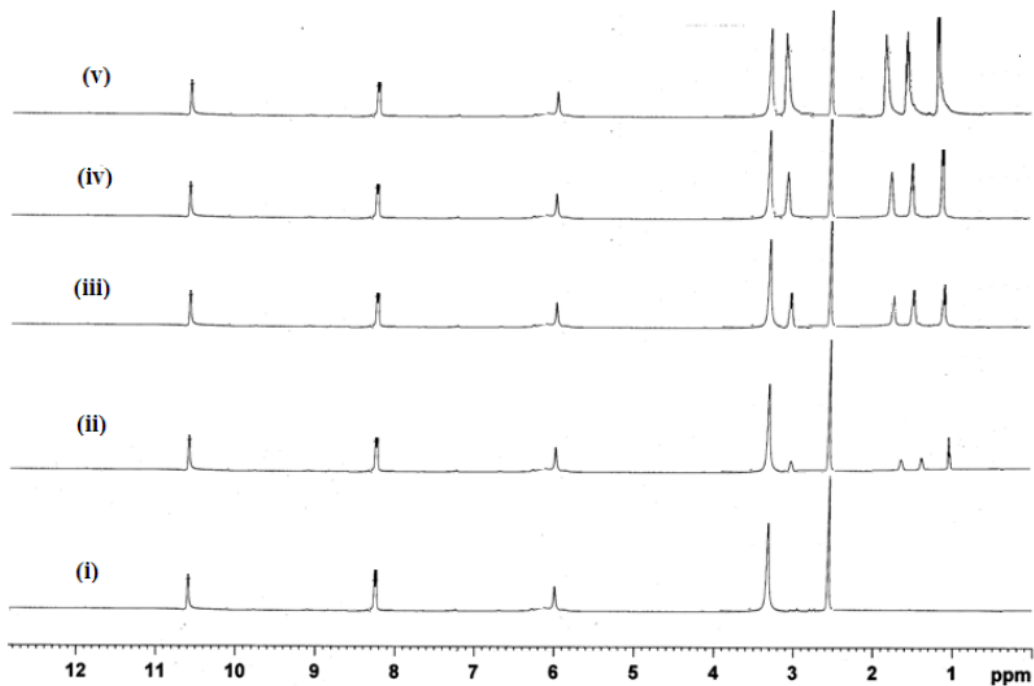

Figure S23:  $^1\text{H-NMR}$  ( $\text{DMSO-d}_6$ ) spectra during titration of complex **5(i)**, with tetrabutyl ammonium fluoride 0.5(ii), 1(iii), 1.5(iv) and 2(v) equivalents.

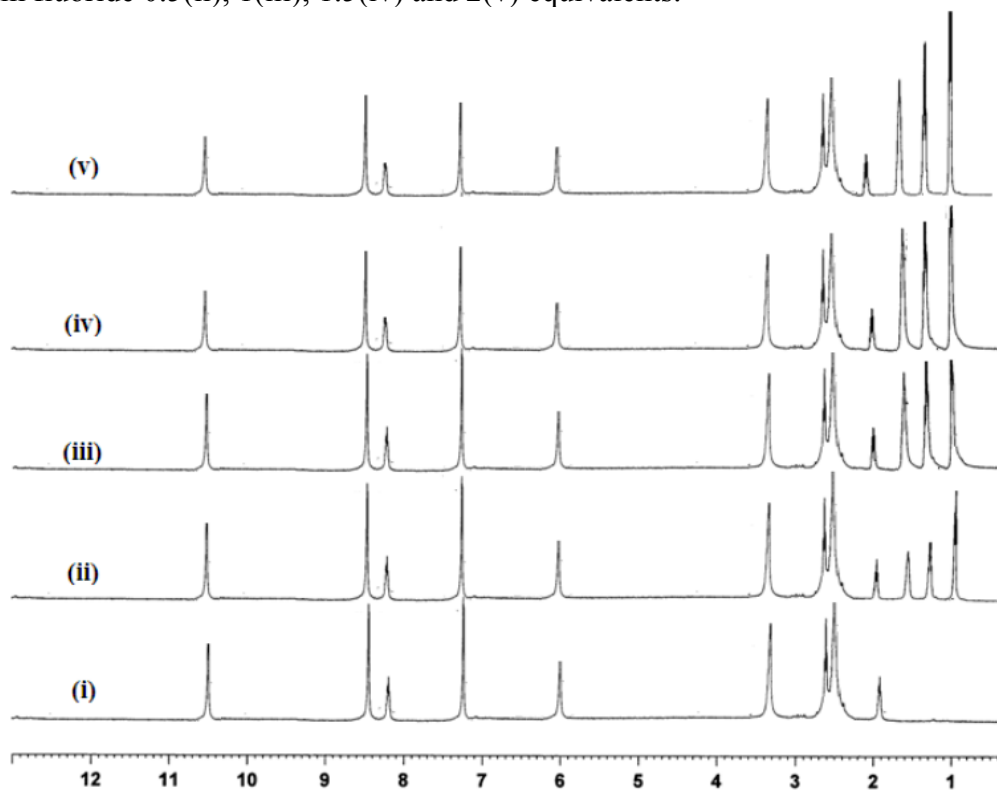

Figure S24:  $^1\text{H-NMR}$  ( $\text{DMSO-d}_6$ ) spectra during titration of complex **7(i)** with tetrabutyl ammonium fluoride 0.5(ii), 1(iii), 1.5(iv) and 2(v) equivalents.

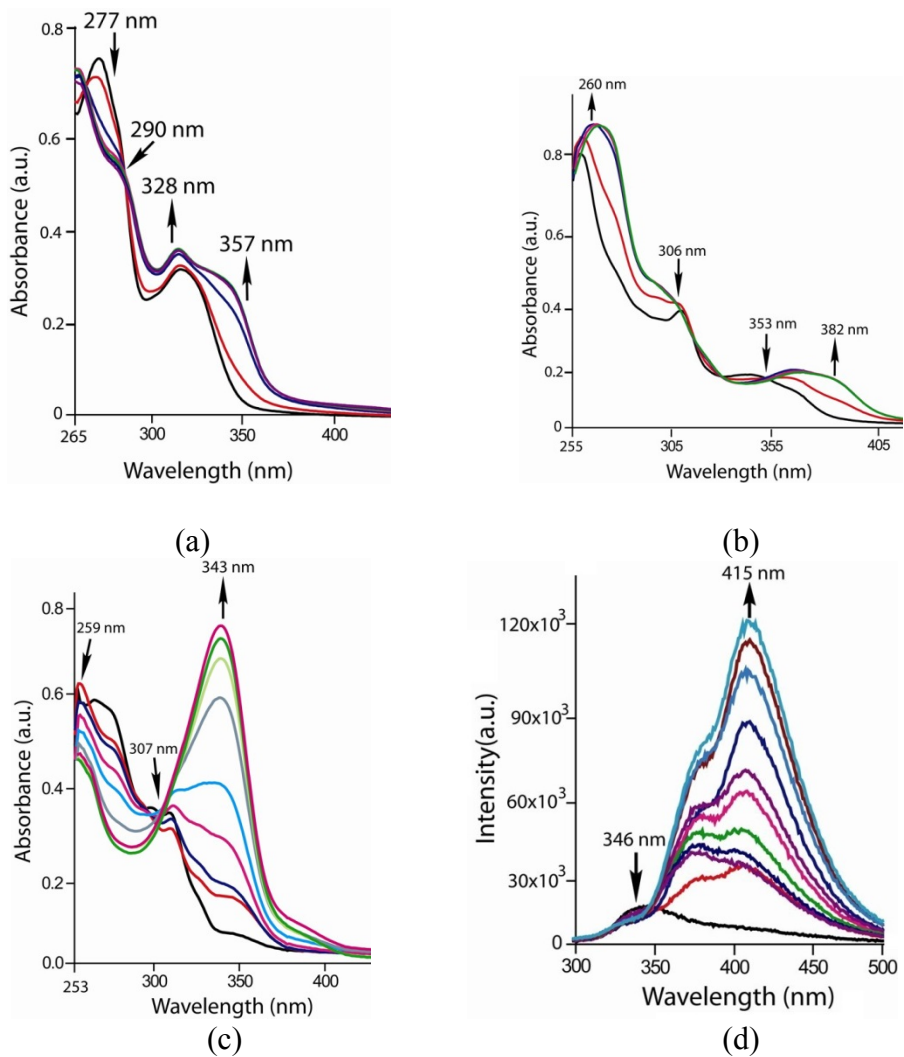

Figure S25: UV-Vis spectra (a) complex **1**, (b) complex **5** and (c) complex **7** on addition of different amount of tetrabutylammonium hydroxide. (d) Fluorescence spectra of complex **7** on addition of different amount of tetrabutylammonium hydroxide.
